# Supplementary material for: Anti-proliferative activity of the NPM1 interacting natural product avrainvillamide in acute myeloid leukemia
Source: PubMed Central journal article supplement (PMC5260983; doi:10.1038/cddis.2016.392), 2016-12-01
Supplement: cddis2016392x1.pdf [file cddis2016392x1.pdf]

## SUPPLEMENTARY FIGURES LEGENDS

**Supplementary Figure 1.** (a) Histogram of MV4-11 cells incubated with DMSO or 0.3 $\mu$ M avrainvillamide for 24h, followed by PI staining and analysis by flow cytometry. Representative result is shown. (b) MV4-11 cells were treated with 30nM, 100nM or 300nM avrainvillamide for 24h prior to PI staining and analysis by flow cytometry. Results represent the mean  $\pm$ SEM of the relative values compared to the untreated controls in SubG1, G1, S and G<sub>2</sub>/M phase ( $n=3$ ; \* $P < 0.05$ , \*\*\* $P < 0.001$ ).

**Supplementary Figure 2.** (a) Primary AML cells were incubated with avrainvillamide (10nM to 30 $\mu$ M) for 24h and proliferation was assayed by <sup>3</sup>H-thymidine incorporation where the mean  $\pm$ SEM of the values relative to vehicle controls are presented. (b) PBMCs from 5 healthy blood donors were incubated for 24h with DMSO (CTR) and avrainvillamide (0.05, 0.1, 1, 3 and 10 $\mu$ M), stained with annexinV-Alexa647/PI and analyzed by flow cytometry. Representative histograms for CTR (DMSO), 1, 3 and 10  $\mu$ M avrainvillamide. Viable cells represent annexinV-PI negative cells. (c) AnnexinV-PI negative cells (live cells) normalized to CTR displayed against concentration of avrainvillamide.

**Supplementary Figure 13.** (a) ~~Primary AML cells were incubated with avrainvillamide (10nM to 30 $\mu$ M) for 24h and proliferation was assayed by <sup>3</sup>H-thymidine incorporation where the mean  $\pm$ SEM of the values relative to vehicle controls are presented.~~ (b) AML patient samples with FAB subtype M1 ( $n=15$ ) and AML patient samples with FAB subtype M5 ( $n=13$ ) were treated

with avrainvillamide (10 $\mu$ M) for 24h and measured with the WST-1 assay. Results represent the mean  $\pm$ SEM of the values relative to vehicle controls (\*\* $P$ <0.01). (**be-de**) Multiparameter flow cytometry analysis of the expression of CD15 (**be**), CD14 (**cd**) and CD11c (**de**) plotted against cellular sensitivity towards avrainvillamide (10 $\mu$ M, 24h) as measured by the WST-1 assay. Results represent mean  $\pm$ SEM of values relative to vehicle controls. Circles represent mean of the relative values compared to the untreated controls (CD15; \* $P$ <0.05; CD14; \* $P$ <0.05, CD11c: Pearson's correlation:  $R^2 = 0.17$ ,  $P$ <0.05). (**fe**) Primary AML patient samples were incubated with avrainvillamide (10 $\mu$ M) for 24h. Circles represent means of the values relative to vehicle controls, plotted against cellular proliferation rate as determined by  $^3$ H-thymidine incorporation in control samples (Pearson's correlation:  $R^2 = 0.25$ ,  $P$ <0.01).

**Supplementary Figure 24.** Representative histograms of OCI-AML3 cells treated for 72h with DMSO (CTR), AVA (0.5 $\mu$ M), BFA (0.5 $\mu$ M) or KPT-330 (0.1 $\mu$ M). Live cells were stained with antibodies (CD163, CD86, CD14 and CD11b) and analyzed by flow cytometry for expression by gating on living cells (dead cells excluded by PI or TO-PRO3 stain). Stained and unstained cells are represented as solid and dotted lines, respectively.

~~**Supplementary Figure 3.** The effect of avrainvillamide on healthy PBMCs. (a) PBMCs from 5 healthy blood donors were incubated for 24h with DMSO (CTR) and avrainvillamide (0.05 $\mu$ M, 0.1 $\mu$ M, 1 $\mu$ M, 3 $\mu$ M and 10 $\mu$ M), stained with annexin V Alexa647/PI and analyzed by flow cytometry. Annexin V negative cells (live cells) normalized to CTR displayed against concentration of avrainvillamide. (b) Representative histogram for 0 (CTR), 1, 3 and 10  $\mu$ M avrainvillamide. Viable cells represent annexin V negative cells.~~
