# Supplementary material for: Anti-proliferative activity of the NPM1 interacting natural product avrainvillamide in acute myeloid leukemia
Source: PubMed Central journal article supplement (PMC5260983; doi:10.1038/cddis.2016.392), 2016-12-01
Supplement: cddis2016392x8.pdf [file cddis2016392x8.pdf]

**Supplementary Table 1. Cell cycle analysis of the effects of avrainvillamide on Molm-13 cells.**

| Avrainvillamide ( $\mu\text{M}$ )  | Untreated |           | 0.3 |           | 1   |          |
|------------------------------------|-----------|-----------|-----|-----------|-----|----------|
|                                    | %         | AU        | %   | AU        | %   | AU       |
| G0/G1                              | 100       | 41        | 137 | 56        | 115 | 47       |
| G2-M                               | 100       | 24        | 71  | 17        | 42  | 10       |
| Synthesis                          | 100       | 28        | 61  | 19        | 32  | 9        |
| Proliferation ( $^3\text{H-Thy}$ ) | 100       | 64000 cpm | 45  | 29000 cpm | 4   | 2600 cpm |
| Sub-G1                             | 100       | 4         | 150 | 6         | 725 | 29       |
| Apoptosis (Hoechst)                | 6         | 18/300    | 12  | 36/300    | 72  | 216/300  |

Molm-13 cells were incubated with DMSO or avrainvillamide (0.3 or  $1\mu\text{M}$ ) for 24h. Results reported as percent relative to vehicle controls in arbitrary units (AU). AU reported in the cell cycle results for untreated cells indicate percentages of the total number of cells assessed with PI ( $n = 3-5$ ) (cpm = counts per minute).

**Supplementary Table 21. Characteristics of primary AML patient samples; 24h assay.**

| Patient no. | Age | Sex | FAB | Cytogenetics     | FLT3        | NPM1 (type mutation) | Previous disease |
|-------------|-----|-----|-----|------------------|-------------|----------------------|------------------|
| 1           | 24  | M   | M2  | Complex          | wt          | wt                   | CML              |
| 2           | 58  | M   | M5  | 46,XY            | wt          | wt                   | <i>De novo</i>   |
| 3           | 77  | F   | M1  | nt               | ITD         | wt                   | <i>De novo</i>   |
| 4           | 62  | M   | M2  | t(4;20)          | wt          | wt                   | Relapse          |
| 5           | 86  | F   | M1  | 46,XX            | nt          | nt                   | <i>De novo</i>   |
| 6           | 65  | M   | M5  | Complex          | wt          | Ins TCTG(A)          | <i>De novo</i>   |
| 7           | 29  | F   | M5  | 46,XX            | ITD, asp835 | wt                   | <i>De novo</i>   |
| 8           | 61  | M   | M2  | -7               | wt          | Ins CCTG(D)          | Relapse          |
| 9           | 53  | M   | M0  | +13              | wt          | wt                   | <i>De novo</i>   |
| 10          | 60  | F   | M5  | 46,XX            | ITD         | Ins TCTG (A)         | <i>De novo</i>   |
| 11          | 72  | M   | M1  | Complex          | wt          | wt                   | MDS              |
| 12          | 60  | F   | M1  | 46,XX            | wt          | Ins TCTG(A)          | <i>De novo</i>   |
| 13          | 67  | F   | M5  | t(9;11), +19     | wt          | wt                   | <i>De novo</i>   |
| 14          | 68  | F   | M1  | 46,XX            | ITD         | wt                   | Relapse          |
| 15          | 68  | M   | M4  | 46, XY           | asp835      | wt                   | MF               |
| 16          | 53  | M   | M5  | nt               | wt          | Ins TCTG(A)          | <i>De novo</i>   |
| 17          | 79  | M   | M5  | nt               | wt          | wt                   | <i>De novo</i>   |
| 18          | 75  | F   | M4  | 46,XX            | ITD         | wt                   | <i>De novo</i>   |
| 19          | 45  | F   | M4  | 46,XX            | wt          | Ins TAGG             | <i>De novo</i>   |
| 20          | 75  | F   | M1  | nt               | ITD         | wt                   | <i>De novo</i>   |
| 21          | 82  | M   | M0  | nt               | wt          | wt                   | PV               |
| 22          | 63  | F   | M4  | 46,XX            | ITD         | wt                   | <i>De novo</i>   |
| 23          | 76  | M   | M0  | 46,XY            | wt          | wt                   | <i>De novo</i>   |
| 24          | 46  | M   | M4  | 46,XY            | ITD         | Ins TGCA             | Relapse          |
| 25          | 32  | F   | M5  | del(5q)          | wt          | Ins TCTG(A)          | <i>De novo</i>   |
| 26          | 29  | M   | M4  | 46,XY            | ITD         | Ins TCTG(A)          | Relapse          |
| 27          | 62  | M   | M4  | +8               | wt          | nt                   | <i>De novo</i>   |
| 28          | 68  | M   | M2  | Complex          | wt          | wt                   | <i>De novo</i>   |
| 29          | 59  | F   | M2  | -7               | wt          | wt                   | <i>De novo</i>   |
| 30          | 82  | M   | M2  | nt               | wt          | wt                   | <i>De novo</i>   |
| 31          | 49  | F   | M2  | Complex          | wt          | wt                   | CML + relapse    |
| 32          | 82  | M   | M5  | - Y              | wt          | wt                   | <i>De novo</i>   |
| 33          | 81  | F   | M1  | 46,XX            | wt          | wt                   | MDS              |
| 34          | 33  | M   | M1  | 46,XY            | wt          | wt                   | <i>De novo</i>   |
| 35          | 35  | M   | M2  | 46,XY            | wt          | wt                   | <i>De novo</i>   |
| 36          | 48  | M   | M4  | inv(16)          | wt          | wt                   | <i>De novo</i>   |
| 37          | 59  | F   | M4  | 46,XX            | ITD         | Ins TCTG(A)          | Relapse          |
| 38          | 36  | M   | M5  | inv(16), +8, +22 | ITD         | wt                   | <i>De novo</i>   |
| 39          | 70  | F   | M4  | 46,XX            | wt          | Ins TGCA             | <i>De novo</i>   |
| 40          | 60  | M   | M4  | 46,XY            | ITD         | wt                   | <i>De novo</i>   |
| 41          | 84  | M   | M1  | Complex          | wt          | wt                   | <i>De novo</i>   |
| 42          | 59  | F   | M4  | 46,XX            | ITD         | Ins                  | <i>De novo</i>   |
| 43          | 72  | F   | M1  | nt               | nt          | nt                   | <i>De novo</i>   |

FAB = French-American-British classification; FLT3 = fms-related tyrosine kinas 3; wt = wild type; mut = mutant; Ins = insertion; MDS = myelodysplastic syndrome; nt = not determined; PV = polycythemia vera; CML = chronic myeloid leukemia.

**Supplementary Table 32. IC50 values of primary AML patient samples**

| Patient No. | FAB | Cytogenetics | FLT3 | NPM1 | Previous disease | IC50, $\mu$ M |
|-------------|-----|--------------|------|------|------------------|---------------|
| 1           | M2  | Complex      | wt   | wt   | CML              | 0.5           |
| 2           | M5  | 46,XY        | wt   | wt   | <i>De novo</i>   | 3.6           |
| 3           | M1  | nt           | ITD  | wt   | <i>De novo</i>   | 0.7           |
| 5           | M1  | 46,XX        | nt   | nt   | <i>De novo</i>   | 27.3          |
| 7           | M5  | Complex      | wt   | Ins  | <i>De novo</i>   | 19.4          |
| 8           | M2  | -7           | wt   | Ins  | <i>De novo</i>   | 110.3 (res)   |
| 10          | M5  | 46,XX        | ITD  | Ins  | <i>De novo</i>   | 6.4           |
| 11          | M1  | Complex      | wt   | wt   | MDS              | 0.6           |
| 13          | M5  | t(9:11),+19  | wt   | wt   | <i>De novo</i>   | 1.1           |
| 18          | M4  | 46,XX        | ITD  | wt   | <i>De novo</i>   | 27.9          |
| 19          | M4  | 46,XX        | wt   | Ins  | <i>De novo</i>   | 7.5           |
| 24          | M4  | 46,XY        | ITD  | Ins  | Relapse          | 1.4           |
| 25          | M5  | del(5q)      | wt   | Ins  | <i>De novo</i>   | 788 (res)     |
| 26          | M4  | 46,XY        | ITD  | Ins  | Relapse          | 207 (res)     |
| 27          | M4  | +8           | wt   | nt   | <i>De novo</i>   | 0.8           |
| 28          | M2  | Complex      | wt   | wt   | <i>De novo</i>   | 5.8           |
| 30          | M2  | nt           | wt   | wt   | <i>De novo</i>   | 53.7          |
| 31          | M2  | Complex      | wt   | wt   | CML              | 3.1           |
| 32          | M5  | -Y           | wt   | wt   | <i>De novo</i>   | 17.1          |
| 33          | M1  | 46,XX        | wt   | wt   | MDS              | 11.1          |
| 36          | M4  | inv(16)      | wt   | wt   | <i>De novo</i>   | 1.8           |
| 41          | M1  | Complex      | wt   | wt   | <i>De novo</i>   | 0.5           |
| 42          | M4  | 46,XX        | ITD  | Ins  | <i>De novo</i>   | 0.3           |
| 43          | M1  | nt           | nt   | nt   | <i>De novo</i>   | 71340(res)    |

FAB = French-American-British classification; FLT3 = fms-related tyrosine kinas 3; wt = wild type; mut = mutant; Ins = insertion; MDS = myelodysplastic syndrome; nt = not determined; CML = chronic myeloid leukemia; res = resistant.

**Supplementary Table 43. Characteristics of AML patient samples; 7 days assay with cytokines.**

| Patient no. | Age | Sex | FAB | Cytogenetics     | FLT3       | NPM-1 (type mutation)  | Previous disease |
|-------------|-----|-----|-----|------------------|------------|------------------------|------------------|
| 1           | 24  | M   | M2  | Complex          | wt         | wt                     | CML              |
| 2           | 58  | M   | M5  | 46,XY            | wt         | wt                     | <i>De novo</i>   |
| 3           | 77  | F   | M1  | nt               | ITD        | wt                     | <i>De novo</i>   |
| 6           | 65  | M   | M5  | Complex          | wt         | Ins TCTG(A)            | <i>De novo</i>   |
| 7           | 29  | F   | M5  | 46,XX            | ITD,Asp835 | wt                     | <i>De novo</i>   |
| 10          | 60  | F   | M5  | 46,XX            | ITD        | Ins TCTG(A)            | <i>De novo</i>   |
| 13          | 67  | F   | M5  | t(9:11),+19      | wt         | wt                     | <i>De novo</i>   |
| 17          | 79  | M   | M5  | nt               | wt         | wt                     | <i>De novo</i>   |
| 18          | 75  | F   | M4  | 46,XX            | ITD        | wt                     | <i>De novo</i>   |
| 19          | 45  | F   | M4  | 46,XX            | wt         | Ins TAGG               | <i>De novo</i>   |
| 20          | 75  | F   | M1  | nt               | ITD        | wt                     | <i>De novo</i>   |
| 23          | 76  | M   | M0  | 46,XY            | wt         | wt                     | <i>De novo</i>   |
| 25          | 32  | F   | M5  | del(5q)          | wt         | Ins                    | <i>De novo</i>   |
| 29          | 59  | F   | M2  | -7               | wt         | wt                     | <i>De novo</i>   |
| 30          | 82  | M   | M2  | nt               | wt         | wt                     | <i>De novo</i>   |
| 31          | 49  | F   | M2  | Complex          | wt         | wt                     | CML+relapse      |
| 33          | 81  | F   | M1  | 46,XX            | wt         | nt                     | MDS              |
| 34          | 33  | M   | M1  | 46,XY            | wt         | wt                     | <i>De novo</i>   |
| 35          | 35  | M   | M2  | 46,XY            | wt         | wt                     | <i>De novo</i>   |
| 36          | 48  | M   | M4  | inv(16)          | wt         | wt                     | <i>De novo</i>   |
| 37          | 59  | F   | M4  | 46,XX            | ITD        | Ins                    | <i>De novo</i>   |
| 38          | 36  | M   | M5  | inv(16), +8, +22 | ITD        | wt                     | <i>De novo</i>   |
| 39          | 70  | F   | M4  | 46,XX            | wt         | Ins TGCA               | <i>De novo</i>   |
| 39          | 70  | F   | M4  | nt               | wt         | Ins TCTG(A)            | MDS              |
| 40          | 60  | M   | M4  | 46,XY            | ITD        | wt                     | <i>De novo</i>   |
| 41          | 84  | M   | M1  | Complex          | wt         | wt                     | <i>De novo</i>   |
| 42          | 59  | F   | M4  | 46,XX            | ITD        | Ins                    | <i>De novo</i>   |
| 43          | 72  | F   | M1  | nt               | nt         | nt                     | <i>De novo</i>   |
| 44          | 67  | M   | M0  | del(5q)          | ITD        | wt                     | <i>De novo</i>   |
| 45          | 71  | M   | M2  | 46,XY            | asp835     | Ins<br>TCTG(A)/CCTG(D) | Relapse          |
| 46          | 72  | M   | M5  | 46,XY            | wt         | Ins TCTG(A)            | <i>De novo</i>   |
| 47          | 43  | M   | M1  | 46,XY            | wt         | wt                     | <i>De novo</i>   |
| 48          | 64  | F   | M2  | 46,XX            | ITD        | Ins                    | Relapse          |
| 49          | 72  | M   | M4  | 46,XY            | ITD        | wt                     | <i>De novo</i>   |
| 50          | 36  | M   | M5  | Complex          | ITD        | wt                     | <i>De novo</i>   |
| 51          | 81  | F   | M2  | nt               | ITD        | Ins TCTG(A)            | <i>De novo</i>   |
| 52          | 42  | F   | M5  | 46,XX            | wt         | Ins TCTG(A)            | <i>De novo</i>   |
| 53          | 65  | M   | M4  | 46,XY            | wt         | wt                     | <i>De novo</i>   |
| 54          | 78  | F   | M0  | Complex          | wt         | wt                     | <i>De novo</i>   |
| 55          | 80  | F   | M2  | Complex          | wt         | wt                     | <i>De novo</i>   |
| 56          | 46  | M   | M1  | 46,XY            | wt         | Ins TCTG(A)            | <i>De novo</i>   |
| 57          | 74  | F   | M2  | nt               | wt         | wt                     | <i>De novo</i>   |

|    |    |   |    |         |     |             |                |
|----|----|---|----|---------|-----|-------------|----------------|
| 58 | 65 | M | M5 | 46,XY   | ITD | Ins TCTG(A) | <i>De novo</i> |
| 59 | 68 | M | M2 | nt      | ITD | Ins         | MDS            |
| 60 | 82 | F | M4 | nt      | ITD | wt          | <i>De novo</i> |
| 61 | 46 | F | M1 | inv(16) | wt  | wt          | <i>De novo</i> |
| 62 | 56 | F | M1 | 46,XX   | wt  | wt          | <i>De novo</i> |
| 63 | 64 | M | M1 | nt      | ITD | Ins TCTG(A) | <i>De novo</i> |
| 64 | 44 | F | M1 | del(7q) | ITD | wt          | <i>De novo</i> |
| 65 | 66 | F | M1 | 46,XX   | wt  | Ins         | <i>De novo</i> |
| 66 | 67 | M | M1 | 46,XY   | ITD | wt          | Relapse        |
| 67 | 61 | M | M4 | 46,XY   | ITD | Ins TCAG    | <i>De novo</i> |

FAB = French-American-British classification; FLT3 = fms-related tyrosine kinas 3; wt = wild type; mut = mutant; Ins = insertion; MDS = myelodysplastic syndrome; nt = not determined; CML = chronic myeloid leukemia.

**Supplementary Table 54. Characteristics of primary AML patient samples**

| <b>Patient no.</b> | <b>Age</b> | <b>FAB</b> |    | <b>Cytogenetics</b> | <b>FLT3</b> | <b>NPM1<br/>(Type mutation)</b> | <b>Previous disease</b> |
|--------------------|------------|------------|----|---------------------|-------------|---------------------------------|-------------------------|
| 46                 | 72         | M          | M5 | 46,XY               | wt          | Ins TCTG(A)                     | <i>De novo</i>          |
| 56                 | 46         | M          | M1 | 46,XY               | wt          | Ins TCTG(A)                     | <i>De novo</i>          |
| 68                 | 64         | M          | M5 | 46,XY               | wt          | Ins TCTG(A)                     | <i>De novo</i>          |
| 69                 | 68         | F          | M5 | 46,XX               | wt          | Ins TCTG(A)                     | <i>De novo</i>          |

FAB = French-American-British classification; FLT3 = fms-related tyrosine kinase 3;

wt = wild type; Ins = insertion.

**Supplementary Table 65. Concentration of BFA in plasma and tumor.**

| Time (h) | Plasma (nM) |        |        | Tumor (nM) |       |       |
|----------|-------------|--------|--------|------------|-------|-------|
|          | 1           | 2      | Mean   | 1          | 2     | Mean  |
| 0        | 0,00        | 0,00   | 0,00   | 0,00       | 0,00  | 0,00  |
| 1        | 181,37      | 145,22 | 163,40 | 57,53      | 81,49 | 69,51 |
| 6        | 61,81       | 71,86  | 66,94  | 30,58      | 42,77 | 37,21 |
| 24       | 13,92       | 9,52   | 11,76  | 16,68      | 21,11 | 18,80 |

Snap-PK for 2 mg/kg BFA (Figure 7A) in two BALB/c mice (1,2), BFA: M.W. 467.56.
